# Supplementary material
Source: PubMed Central journal article supplement (PMC6548443)
Supplement: NIHMS1030908-supplement-1.pdf [file NIHMS1030908-supplement-1.pdf]

## **Supplemental Material**

| Supplemental Table 1. Coefficients of variation and assay type for each biomarker |                  |                                                                                                                                   |
|-----------------------------------------------------------------------------------|------------------|-----------------------------------------------------------------------------------------------------------------------------------|
| Biomarker                                                                         | Range of CVs (%) | Assay                                                                                                                             |
| CRP                                                                               | 0.3 - 9.5        | Highly sensitive immunoturbidimetric assay <sup>1</sup> or high-sensitivity latex-enhanced immunonephelometric assay <sup>2</sup> |
| IL-6                                                                              | 1.9 - 15.3       | Enzyme-linked immunosorbent assay (R&D Systems, Minneapolis, MN)                                                                  |
| HbA <sub>1c</sub>                                                                 | 1.2 - 1.6        | Turbidimetric immunoinhibition immunoassay (Roche Diagnostics, Indianapolis, IN)                                                  |
| ICAM-1                                                                            | 2.3 - 8.9        | Enzyme-linked immunosorbent assay (R&D Systems, Minneapolis, MN)                                                                  |
| HDL-C                                                                             | 1.3 - 6.6        | Measured enzymatically <sup>3</sup>                                                                                               |
| LDL-C                                                                             | 1.3 - 6.7        | Measured enzymatically <sup>3</sup>                                                                                               |
| Triglycerides                                                                     | 1.2 - 10.4       | Measured enzymatically <sup>4</sup>                                                                                               |
| Total Cholesterol                                                                 | 1.0 - 6.2        | Measured enzymatically <sup>5</sup>                                                                                               |

<sup>1</sup>Roche Diagnostics, Indianapolis, IN; or Denka Seiken, Tokyo, Japan

<sup>2</sup>Dade-Behring, Newark, DE

<sup>3</sup>Roche Diagnostics, Indianapolis, IN; or Genzyme, Cambridge, MA; or Abbot Laboratories, Abbot Park, IL

<sup>4</sup>Roche Diagnostics, Indianapolis, IN; or Genzyme, Cambridge, MA; or Thermo Fisher Scientific, Oy, Finland

<sup>5</sup>Roche Diagnostics, Indianapolis, IN; or Genzyme, Cambridge, MA; or Abbot Laboratories, Abbot Park, IL; or Thermo Fisher Scientific, Oy, Finland

**Supplemental Table 2.** Age-standardized characteristics of participants by history of pregnancy complications among controls

|                                                     | Only Normotensive<br>(n=3,428) | Ever Hypertensive<br>Disorder of<br>Pregnancy<br>(n=354) | Normotensive           |                         |
|-----------------------------------------------------|--------------------------------|----------------------------------------------------------|------------------------|-------------------------|
|                                                     |                                |                                                          | Only Term<br>(n=3,037) | Ever Preterm<br>(n=388) |
| Age at first birth in years, <sup>1</sup> mean (SD) | 26.5 (4.3)                     | 26.8 (4.4)                                               | 26.6 (4.2)             | 26.4 (4.6)              |
| Age at blood draw <sup>1</sup>                      |                                |                                                          |                        |                         |
| <40 years                                           | 16.4                           | 18.6                                                     | 16.1                   | 19.1                    |
| 40 to <45 years                                     | 34.9                           | 38.7                                                     | 35.7                   | 29.1                    |
| ≥45 years                                           | 48.7                           | 42.7                                                     | 48.2                   | 51.8                    |
| White                                               | 97.8                           | 97.7                                                     | 97.8                   | 97.7                    |
| Years between first birth and blood draw, mean (SD) | 17.6 (6.6)                     | 17.4 (6.5)                                               | 17.6 (6.5)             | 17.6 (7.0)              |
| <b>Characteristics at blood draw:</b>               |                                |                                                          |                        |                         |
| Smoking at blood draw                               |                                |                                                          |                        |                         |
| Past or never smoker                                | 93.8                           | 92.0                                                     | 94.1                   | 90.7                    |
| Current smoker                                      | 6.2                            | 8.0                                                      | 5.9                    | 9.3                     |
| Alcohol consumption in month prior to blood draw    |                                |                                                          |                        |                         |
| No drinks in past month                             | 32.2                           | 42.6                                                     | 31.7                   | 36.1                    |
| Moderate drinker in past month                      | 58.6                           | 49.8                                                     | 58.7                   | 57.0                    |
| Heavy drinker in past month                         | 9.2                            | 7.7                                                      | 9.5                    | 7.0                     |
| Menopausal status at blood draw                     |                                |                                                          |                        |                         |
| Pre-menopausal                                      | 82.4                           | 80.2                                                     | 82.5                   | 81.1                    |
| Post-menopausal                                     | 10.3                           | 9.7                                                      | 10.3                   | 10.3                    |
| Unknown                                             | 7.4                            | 10.2                                                     | 7.2                    | 8.6                     |
| Post-menopausal hormone use at blood draw           | 15.8                           | 20.6                                                     | 15.7                   | 17.3                    |
| History of infertility at blood draw                | 6.7                            | 7.8                                                      | 6.2                    | 9.9                     |
| Parity at blood draw                                |                                |                                                          |                        |                         |
| 1 birth                                             | 14.6                           | 15.2                                                     | 14.9                   | 11.2                    |
| ≥2 births                                           | 85.5                           | 84.8                                                     | 85.1                   | 88.7                    |
| <b>Potential Confounders:</b>                       |                                |                                                          |                        |                         |
| Pre-pregnancy BMI                                   |                                |                                                          |                        |                         |
| Underweight (<18.5 kg/m <sup>2</sup> )              | 2.1                            | 2.3                                                      | 2.1                    | 2.0                     |
| Normal weight (18.5-24.9 kg/m <sup>2</sup> )        | 89.3                           | 79.0                                                     | 89.4                   | 88.9                    |
| Overweight (25-29.9 kg/m <sup>2</sup> )             | 7.3                            | 13.3                                                     | 7.2                    | 8.3                     |
| Obese (≥30 kg/m <sup>2</sup> )                      | 1.2                            | 5.4                                                      | 1.3                    | 0.8                     |
| Pre-pregnancy Alternative Healthy Eating Index      |                                |                                                          |                        |                         |
| First quintile (unhealthiest)                       | 20.7                           | 22.7                                                     | 20.7                   | 20.8                    |
| Fifth quintile (healthiest)                         | 18.2                           | 16.9                                                     | 17.9                   | 20.8                    |
| Strenuous physical activity, age 18-22 years        |                                |                                                          |                        |                         |
| Never                                               | 30.7                           | 31.7                                                     | 30.7                   | 30.5                    |
| 10-12 months per year                               | 10.5                           | 10.7                                                     | 10.2                   | 13.1                    |

Values are percentages unless otherwise specified and are standardized to the age distribution of the study population. Values of polytomous variables may not sum to 100% due to rounding. Characteristics at blood draw were matching factors in sub-studies included in the analysis

<sup>1</sup> Value is not age adjusted

**Supplemental Table 3.** Percent difference in post-pregnancy biomarkers and 95% confidence intervals comparing women with only normotensive pregnancies to women with a history of a hypertensive disorder of pregnancy (HDP) among controls

|                                         | Normotensive Only    | Ever HDP             |
|-----------------------------------------|----------------------|----------------------|
| <b>CRP</b>                              | n=1,821              | n=176                |
| CRP level, mg/L, median (IQR)           | 0.79 (0.37, 1.95)    | 1.31 (0.51, 2.48)    |
| Model 1                                 | ref                  | 32.4 (12.8, 55.4)    |
| Model 2                                 | ref                  | 29.4 (10.4, 51.7)    |
| <b>IL-6</b>                             | n=1,621              | n=152                |
| IL-6 level, pg/mL, median (IQR)         | 0.88 (0.62, 1.32)    | 1.11 (0.74, 1.63)    |
| Model 1                                 | ref                  | 16.7 (5.5, 29.1)     |
| Model 2                                 | ref                  | 14.0 (3.2, 26.1)     |
| <b>HbA<sub>1c</sub></b>                 | n=792                | n=93                 |
| HbA <sub>1c</sub> , %, median (IQR)     | 5.38 (5.21, 5.53)    | 5.38 (5.21, 5.48)    |
| Model 1                                 | ref                  | -0.1 (-1.0, 0.8)     |
| Model 2                                 | ref                  | -0.3 (-1.2, 0.6)     |
| <b>ICAM-1</b>                           | n=1,093              | n=109                |
| ICAM-1, ng/mL, median (IQR)             | 231.5 (207.3, 261.2) | 244.1 (213.5, 273.6) |
| Model 1                                 | ref                  | 4.1 (-0.6, 9.2)      |
| Model 2                                 | ref                  | 2.8 (-1.8, 7.7)      |
| <b>HDL-C</b>                            | n=812                | n=96                 |
| HDL-C level, mg/dL, median (IQR)        | 58.8 (51.0, 69.1)    | 56.2 (47.0, 66.5)    |
| Model 1                                 | ref                  | -2.9 (-8.1, 2.6)     |
| Model 2                                 | ref                  | -2.2 (-7.2, 3.2)     |
| <b>LDL-C</b>                            | n=812                | n=96                 |
| LDL-C level, mg/dL, median (IQR)        | 111.8 (92.7, 130.0)  | 109.3 (89.7, 129.8)  |
| Model 1                                 | ref                  | -1.6 (-7.3, 4.5)     |
| Model 2                                 | ref                  | -2.3 (-7.9, 3.7)     |
| <b>Triglycerides</b>                    | n=1,254              | n=150                |
| Triglyceride level, mg/dL, median (IQR) | 85.3 (65.0, 121.2)   | 86.2 (67.4, 131.5)   |
| Model 1                                 | ref                  | 3.2 (-4.8, 11.8)     |
| Model 2                                 | ref                  | -0.2 (-7.7, 7.9)     |
| <b>Total Cholesterol</b>                | n=2,085              | n=224                |
| Total cholesterol, mg/dL, median (IQR)  | 190.3 (171.2, 213.1) | 193.4 (167.9, 214.3) |
| Model 1                                 | ref                  | 0.0 (-2.4, 2.4)      |
| Model 2                                 | ref                  | -0.5 (-2.9, 1.9)     |

Model 1 is adjusted for the following criteria for sample selection for laboratory analysis: age at blood draw, race, menopausal status at blood draw, smoking at blood draw, alcohol intake at blood draw, post-menopausal hormone use at blood draw, and history of infertility at blood draw.

Model 2 is additionally adjusted for pre-pregnancy BMI, diet, and physical activity, and parity at blood draw.

The null value comparing ever HDP to only normotensive is 0.0 percent difference.

**Supplemental Table 4.** Percent difference in post-pregnancy biomarkers and 95% confidence intervals among women with no history of HDP, comparing women with only term deliveries to women with a history of preterm deliveries among controls

|                                        | Only Term<br>(≥37 weeks) | Ever Preterm<br>(<37 weeks) | Ever Moderate Preterm<br>(≥32 to <37 weeks) | Ever Very Preterm<br>(<32 weeks) |
|----------------------------------------|--------------------------|-----------------------------|---------------------------------------------|----------------------------------|
| <b>CRP</b>                             | n=1,623                  | n=198                       | n=154                                       | n=44                             |
| CRP level, mg/L, median (IQR)          | 0.79 (0.36, 2.03)        | 0.81 (0.40, 1.68)           | 0.81 (0.42, 1.72)                           | 0.70 (0.35, 1.37)                |
| Model 1                                | ref                      | -5.2 (-18.3, 10.1)          | -0.4 (-15.3, 17.2)                          | -20.2 (-42.2, 10.4)              |
| Model 2                                | ref                      | -4.2 (-17.4, 11.1)          | 0.2 (-14.7, 17.8)                           | -18.2 (-40.4, 12.5)              |
| <b>IL-6</b>                            | n=1,442                  | n=179                       | n=140                                       | n=39                             |
| IL-6 level, pg/mL, median (IQR)        | 0.88 (0.62, 1.33)        | 0.89 (0.63, 1.32)           | 0.87 (0.61, 1.31)                           | 0.96 (0.71, 1.36)                |
| Model 1                                | ref                      | 1.6 (-8.1, 12.3)            | 0.8 (-10.0, 12.9)                           | 4.6 (-14.2, 27.4)                |
| Model 2                                | ref                      | 1.7 (-8.0, 12.5)            | 0.7 (-10.2, 12.8)                           | 5.8 (-13.2, 29.0)                |
| <b>HbA<sub>1C</sub></b>                | n=706                    | n=84                        | n=65                                        | n=19                             |
| HbA <sub>1C</sub> , %, median (IQR)    | 5.38 (5.21, 5.53)        | 5.41 (5.24, 5.53)           | 5.42 (5.21, 5.53)                           | 5.38 (5.26, 5.53)                |
| Model 1                                | ref                      | 0.2 (-0.8, 1.2)             | 0.2 (-0.9, 1.4)                             | 0.2 (-1.2, 1.6)                  |
| Model 2                                | ref                      | 0.2 (-0.8, 1.1)             | 0.2 (-1.0, 1.3)                             | 0.1 (-1.3, 1.5)                  |
| <b>ICAM-1</b>                          | n=967                    | n=125                       | n=92                                        | n=33                             |
| ICAM-1, ng/mL, median (IQR)            | 231.5 (207.6, 260.0)     | 231.2 (203.6, 265.5)        | 225.7 (201.1, 263.2)                        | 246.1 (220.7, 278.6)             |
| Model 1                                | ref                      | 1.6 (-2.3, 5.7)             | 0.3 (-4.1, 4.9)                             | 5.5 (-2.2, 13.8)                 |
| Model 2                                | ref                      | 1.6 (-2.4, 5.7)             | 0.6 (-3.8, 5.2)                             | 4.4 (-3.2, 12.5)                 |
| <b>HDL-C</b>                           | n=722                    | n=90                        | n=70                                        | n=20                             |
| HDL level, mg/dL, median (IQR)         | 58.7 (50.6, 68.7)        | 59.5 (51.7, 70.8)           | 59.7 (51.4, 71.0)                           | 57.1 (52.1, 70.5)                |
| Model 1                                | ref                      | 2.5 (-2.8, 8.1)             | 1.8 (-4.3, 8.2)                             | 5.0 (-4.9, 15.9)                 |
| Model 2                                | ref                      | 2.8 (-2.6, 8.5)             | 2.1 (-3.9, 8.6)                             | 5.2 (-5.0, 16.6)                 |
| <b>LDL-C</b>                           | n=722                    | n=90                        | n=70                                        | n=20                             |
| LDL level, mg/dL, median (IQR)         | 111.5 (92.0, 130.0)      | 112.8 (96.3, 131.2)         | 111.3 (94.6, 126.1)                         | 117.3 (106.9, 135.4)             |
| Model 1                                | ref                      | 2.8 (-2.3, 8.2)             | 2.0 (-3.8, 8.1)                             | 5.7 (-3.1, 15.3)                 |
| Model 2                                | ref                      | 2.5 (-2.6, 7.9)             | 1.8 (-4.0, 7.9)                             | 5.0 (-3.6, 14.3)                 |
| <b>Triglycerides</b>                   | n=1,112                  | n=141                       | n=108                                       | n=33                             |
| Triglycerides, mg/dL, median (IQR)     | 85.3 (65.0, 121.7)       | 85.0 (61.6, 117.3)          | 83.8 (61.3, 114.8)                          | 100.7 (70.2, 134.7)              |
| Model 1                                | ref                      | -4.5 (-12.1, 3.8)           | -6.8 (-15.3, 2.6)                           | 3.5 (-10.2, 19.3)                |
| Model 2                                | ref                      | -4.2 (-11.7, 4.0)           | -6.3 (-14.8, 3.0)                           | 3.3 (-10.1, 18.8)                |
| <b>Total Cholesterol</b>               | n=1,848                  | n=235                       | n=175                                       | n=60                             |
| Total Cholesterol, mg/dL, median (IQR) | 190.3 (170.9, 213.2)     | 191.5 (174.5, 213.1)        | 189.3 (172.2, 213.1)                        | 199.1 (181.0, 213.3)             |
| Model 1                                | ref                      | 0.4 (-1.7, 2.6)             | -0.1 (-2.5, 2.4)                            | 1.9 (-1.9, 5.7)                  |
| Model 2                                | ref                      | 0.4 (-1.7, 2.5)             | 0.1 (-2.4, 2.6)                             | 1.2 (-2.5, 5.1)                  |

Model 1 is adjusted for the following criteria for sample selection for laboratory analysis: age at blood draw, race, menopausal status at blood draw, smoking at blood draw, alcohol intake at blood draw, post-menopausal hormone use at blood draw, and history of infertility at blood draw.

Model 2 is additionally adjusted for pre-pregnancy BMI, diet, and physical activity, and parity at blood draw.

The null value comparing ever preterm groups to only term is 0.0 percent difference.
